# Supplementary material
Source: publisher site journal article supplement (https://www.dovepress.com/article/supplementary_file/547427/547427%20Revised%20%252509Supplementary%20data.xlsx)
Supplement: Supplementary file 1 [file 547427%20Revised%20%252509Supplementary%20data.xlsx]

## Sheet: Table S1
Table S1 Details of NIPT for detecting SCAs
NIPT result	IVF group			NC group
	TP	FP	PPV	TP	FP	PPV
45,X	2	5	0.285714	40	160	0.2
47,XXX	2	3	0.4	36	40	0.473684
47,XXY	4	1	0.8	53	32	0.623529
47,XYY	1	1	0.5	29	6	0.828571
Total	9	9	0.5	158	238	0.39899

## Sheet: Table S2
Table S2 Performance of NIPT for detecting RAAs
Abnormal chromosome	IVF group			NC group
	TP	FP	PPV	TP	FP	PPV
1	0	0	-	0	7	0
2	0	0	-	2	3	0.4
3	0	0	-	0	8	0
4	0	0	-	0	4	0
5	0	0	-	0	3	0
6	0	0	-	0	3	0
7	0	5	0	2	51	0.0377358
8	0	0	-	1	20	0.047619
9	0	0	-	3	6	0.333333
10	0	0	-	0	7	0
11	0	0	-	1	1	0.5
12	0	0	-	0	0	-
13	0	1	0	0	3	0
14	0	2	0	0	14	0
15	0	0	-	1	0	1
16	0	0	-	1	7	0.125
17	0	0	-	0	1	0
18	0	1	0	2	5	0.285714
19	0	0	-	0	0	-
20	0	0	-	0	6	0
21	0	0	-	1	15	0.0625
22	0	0	-	0	5	0
Total	0	9	0	14	169	0.0765027
